# Supplementary material
Source: Elsevier journal article supplement (https://www.sciencedirect.com/science/article/pii/S021391111630125X)
Supplement: mmc1 [file S021391111630125X:mmc1.pdf]

**Anexo 1.**

En la siguiente imagen y tabla se presentan diferentes intervenciones de nuestro contexto en las que se está trabajando con el proceso de identificación de activos.

En la tabla se describe brevemente algunos elementos relacionados con las fases de trabajo de cada uno de los proyectos.

La tabla se puede consultar [en el siguiente enlace](#).

Si quieres añadir a la tabla tu proyecto y la metodología de trabajo que se utiliza puedes ponerte en contacto con [obsaludasturias@asturias.org](mailto:obsaludasturias@asturias.org)

**Última actualización: 28 de abril 2016**

## PROYECTOS DE IDENTIFICACIÓN DE ACTIVOS

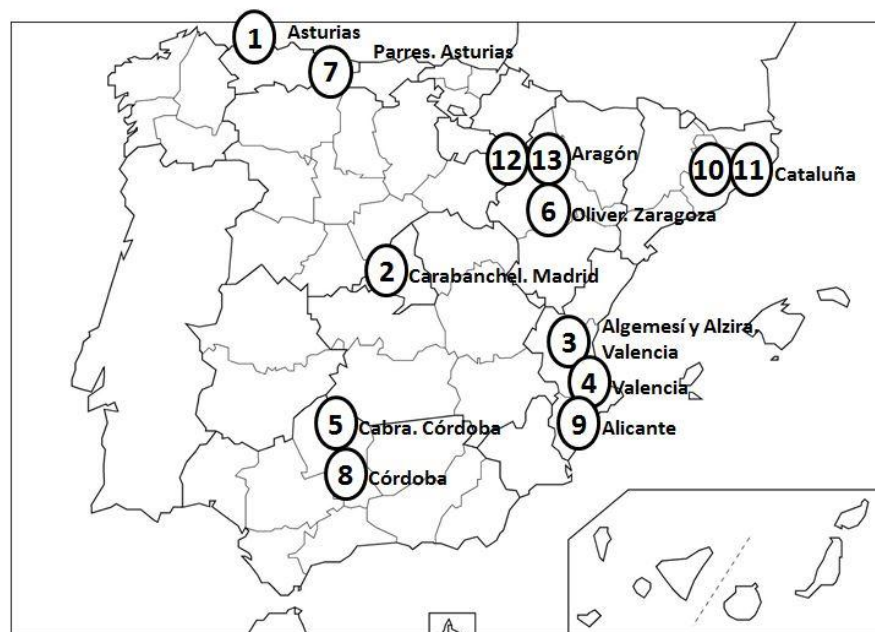

1. Asturias Actúa en Salud.
2. Mapeando Carabanchel Alto
3. Projecte RIU "Un riu de cultures, un riu de salut"
4. Programa mihsalud: mujeres, infancia y hombres construyendo salud
5. Generación de mapas de activos de salud por población infantil de Cabra (Córdoba)
6. Recursos para tu Salud: Tu salud está en tu barrio
7. Revitalización de un Consejo de Salud: Renovarse o morir
8. Mapas de activos de salud por mujeres en situación de vulnerabilidad en el Área de Gestión Sanitaria del Sur de Córdoba.
9. FIS: Mapa de activos: ciudadanía, profesionales políticos identificando espacios de oportunidad para mejorar la salud de la población.
10. Salud Comunitaria basada en activos en Cataluña
11. Plan Interdepartamental de Salud Pública de Cataluña
12. Red Aragonesa de Proyectos de Promoción de la Salud (RAPPS)
13. Red Aragonesa de Escuelas Promotoras de Salud (RAEPS)

|                                                       |                                                                                                                                                                                                                                                                                                                                                                                                                  |
|-------------------------------------------------------|------------------------------------------------------------------------------------------------------------------------------------------------------------------------------------------------------------------------------------------------------------------------------------------------------------------------------------------------------------------------------------------------------------------|
| <b>Nombre del proyecto</b>                            | <b>1. Asturias Actúa en Salud</b>                                                                                                                                                                                                                                                                                                                                                                                |
| <b>Breve descripción</b>                              | Identificación de actividades comunitarias y activos para la salud en Asturias.                                                                                                                                                                                                                                                                                                                                  |
| <b>Lugar de realización</b>                           | Asturias                                                                                                                                                                                                                                                                                                                                                                                                         |
| <b>Equipo de trabajo</b>                              | El proyecto se coordina desde el Observatorio de Salud en Asturias. Dirección General de Salud Pública.<br>La identificación de activos se puede realizar desde cualquier centro sanitario, asociación, institución local o cualquier ciudadano/a.<br>El proceso de identificación de activos puede ir vinculado a la revitalización de espacios de participación y la implementación de intervenciones locales. |
| <b>Dimensión de salud en la que se trabaja</b>        | De forma global sobre todas las dimensiones de la salud.                                                                                                                                                                                                                                                                                                                                                         |
| <b>Población participante</b>                         | Para todo el conjunto de la población asturiana.                                                                                                                                                                                                                                                                                                                                                                 |
| <b>Incorporación de ejes de equidad</b>               | En aquellos procesos de identificación de activos ligados a planes de intervención locales se incorpora la formación específica en perspectiva de equidad.                                                                                                                                                                                                                                                       |
| <b>Técnicas de identificación de activos empleada</b> | Múltiples.<br>Desde una persona que observa un activo y lo sube a la página web, hasta una asociación que trabaja con mapping-party o un grupo de niños/as que hace un Fotovoz.                                                                                                                                                                                                                                  |
| <b>Difusión de la información</b>                     | A través de la página web y de la aplicación para dispositivos móviles. En otros formatos físicos (folletos, mapas) para proyectos de intervención local.                                                                                                                                                                                                                                                        |
| <b>Dinamización de activos y acciones generadas</b>   | El mapeo de activos se está utilizando en el proceso de puesta en marcha de procesos de intervención local.<br>Se están conectando los activos con los sistemas de información de Atención Primaria para favorecer su conocimiento y utilización por los profesionales sanitarios en el contexto de un abordaje biopsicosocial en la práctica clínica                                                            |
| <b>Evaluación del proceso y de las</b>                | Se han elaborado diferentes evaluaciones:                                                                                                                                                                                                                                                                                                                                                                        |

|                                                     |                                                                                                                                                                                                                                                                                                                                                                                                                                                                                                                                                                                                                                                                                                                                                                                 |
|-----------------------------------------------------|---------------------------------------------------------------------------------------------------------------------------------------------------------------------------------------------------------------------------------------------------------------------------------------------------------------------------------------------------------------------------------------------------------------------------------------------------------------------------------------------------------------------------------------------------------------------------------------------------------------------------------------------------------------------------------------------------------------------------------------------------------------------------------|
| <b>acciones generadas</b>                           | <ul style="list-style-type: none"><li>- Evaluación global del Observatorio de Salud de Asturias: métricas de web y redes sociales, y opinión de los profesionales de la salud sobre las herramientas del mismo. Disponible <a href="#">aquí</a>.</li><li>- Una evaluación sobre la incorporación de la perspectiva de equidad en los proyectos del Observatorio (mediante una herramienta ad hoc que se ha realizado modificando la herramienta para “identificar los impactos de los Determinantes Sociales de las Desigualdades en Salud” elaborada por el Gobierno del País Vasco).</li><li>- Una evaluación sobre el pilotaje de la mejora de Asturias Actúa y su conexión con los sistemas de información de Atención Primaria. Disponible <a href="#">aquí</a>.</li></ul> |
| <b>Información complementaria sobre el proyecto</b> | Página web: <a href="http://www.obsaludasturias.com/">http://www.obsaludasturias.com/</a><br>Twitter: <a href="#">@obsaludasturias</a>                                                                                                                                                                                                                                                                                                                                                                                                                                                                                                                                                                                                                                          |
|                                                     |                                                                                                                                                                                                                                                                                                                                                                                                                                                                                                                                                                                                                                                                                                                                                                                 |

|                                                       |                                                                                                                                                                                                                                                                                                                                                                                                                                                      |
|-------------------------------------------------------|------------------------------------------------------------------------------------------------------------------------------------------------------------------------------------------------------------------------------------------------------------------------------------------------------------------------------------------------------------------------------------------------------------------------------------------------------|
| <b>Nombre del proyecto</b>                            | <b>2. Mapeando Carabanchel Alto</b>                                                                                                                                                                                                                                                                                                                                                                                                                  |
| <b>Breve descripción</b>                              | Mapeo participativo de los activos de la comunidad que promueven la salud, Visibilización, dinamización y transformación de los activos para dar respuesta a las necesidades de los ciudadanos.                                                                                                                                                                                                                                                      |
| <b>Lugar de realización</b>                           | Barrio de Carabanchel Alto, Madrid.                                                                                                                                                                                                                                                                                                                                                                                                                  |
| <b>Equipo de trabajo</b>                              | Mesa intersectorial en la que participan técnicos, administración y ciudadanía del barrio de Carabanchel Alto                                                                                                                                                                                                                                                                                                                                        |
| <b>Dimensión de salud en la que se trabaja</b>        | De forma global sobre todas las dimensiones de la salud.                                                                                                                                                                                                                                                                                                                                                                                             |
| <b>Población participante</b>                         | Ciudadanos del barrio de Carabanchel Alto y barrios limítrofes.                                                                                                                                                                                                                                                                                                                                                                                      |
| <b>Incorporación de ejes de equidad</b>               | A lo largo de todo el proceso                                                                                                                                                                                                                                                                                                                                                                                                                        |
| <b>Técnicas de identificación de activos empleada</b> | Búsqueda en internet y redes sociales, tertulias de café, photo-voice, paseos, entrevistas a informadores clave, dinámicas en las fiestas del barrio, grupos focales,                                                                                                                                                                                                                                                                                |
| <b>Difusión de la información</b>                     | A través de la página web, vídeos y redes sociales. En formatos físicos: dípticos (adaptados según franja de edad), posters, mapas, corchos informativos. Mediante distintas intervenciones en aulas de institutos, en las fiestas del barrio, en paseos, en exposiciones itinerantes. Desde las consultas del centro de salud como prescripción social.                                                                                             |
| <b>Dinamización de activos y acciones generadas</b>   | Se ha creado una red de activos entre los que se comparte información, necesidades y recursos, estableciéndose sinergias entre unos y otros.<br>Mediante esta red y las diferentes intervenciones los recursos del barrio se transforman para dar una mejor respuesta a las necesidades de sus vecinos.<br>Todas las intervenciones tienen una evaluación y una actuación posterior (siguiendo la metodología de investigación-acción-participación) |

|                                                           |                                                                                                                                                                                                                                                                                                                                                                                                                         |
|-----------------------------------------------------------|-------------------------------------------------------------------------------------------------------------------------------------------------------------------------------------------------------------------------------------------------------------------------------------------------------------------------------------------------------------------------------------------------------------------------|
| <b>Evaluación del proceso y de las acciones generadas</b> | <p>La evaluación del proceso y sus objetivos es continua.</p> <p>Se ha realizado una evaluación de la iniciativa dentro del grupo motor mediante encuesta a los profesionales de las diferentes entidades, siendo el resultado muy positivo.</p> <p>Cada una de las intervenciones está diseñada con una evaluación propia que nos ayude a mejorar las actuaciones posteriores y a transformar y mejorar el barrio.</p> |
| <b>Información complementaria sobre el proyecto</b>       | <p>Página web: <a href="http://mapeandoporcarabanchelalto.blogspot.com.es/">http://mapeandoporcarabanchelalto.blogspot.com.es/</a></p> <p>Twitter: <a href="https://twitter.com/MapCarabanchelA">@MapCarabanchelA</a></p> <p>Vídeo: <a href="https://www.youtube.com/watch?v=TV6YT32_YQc">https://www.youtube.com/watch?v=TV6YT32_YQc</a></p>                                                                           |
|                                                           |                                                                                                                                                                                                                                                                                                                                                                                                                         |

|                                                       |                                                                                                                                                                                                                                                                                                                                                                                                                                                                                                                                                                                                                                                                                                                                                                                                                         |
|-------------------------------------------------------|-------------------------------------------------------------------------------------------------------------------------------------------------------------------------------------------------------------------------------------------------------------------------------------------------------------------------------------------------------------------------------------------------------------------------------------------------------------------------------------------------------------------------------------------------------------------------------------------------------------------------------------------------------------------------------------------------------------------------------------------------------------------------------------------------------------------------|
| <b>Nombre del proyecto</b>                            | <b>3. ProjecteRIU: "Unriu de cultures, un riu de salut"</b>                                                                                                                                                                                                                                                                                                                                                                                                                                                                                                                                                                                                                                                                                                                                                             |
| <b>Breve descripción</b>                              | Proyecto de salud comunitaria, basado en los modelos de promoción de salud y activos para la salud, que se desarrolla en barrios en situación de elevada vulnerabilidad social para facilitar el acceso a los servicios sanitarios y programas preventivos.                                                                                                                                                                                                                                                                                                                                                                                                                                                                                                                                                             |
| <b>Lugar de realización</b>                           | Barrio Raval de SantRoc del municipio de Algemesí y Barrio de L'Alquerieta del municipio de Alzira, ambos en la provincia de Valencia.                                                                                                                                                                                                                                                                                                                                                                                                                                                                                                                                                                                                                                                                                  |
| <b>Equipo de trabajo</b>                              | Proyecto del Centro de Salud Pública de Alzira (Valencia), gestionado por la Fundación para la Investigación Sanitaria y Biomédica de la Comunitat Valenciana (FISABIO) y apoyado por los Ayuntamientos de Algemesí y Alzira. Colabora asistencia sanitaria del departamento de salud de La Ribera.<br>El equipo técnico RIU está formado por: el responsable del proyecto (médico de salud pública), la coordinadora del proyecto (psicóloga) y dos técnicos responsables de la formación-acción de agentes de salud (una socióloga y un animador sociocultural).<br>Colabora el grupo de agentes de salud así como profesionales que forman la Red Intersectorial RIU de apoyo al proyecto, especialmente, salud pública, asistencia sanitaria, servicios sociales, igualdad, educación, cultura y tejido asociativo. |
| <b>Dimensión de salud en la que se trabaja</b>        | Global. La salud desde el modelo de los determinantes sociales en salud de la OMS                                                                                                                                                                                                                                                                                                                                                                                                                                                                                                                                                                                                                                                                                                                                       |
| <b>Población participante</b>                         | Población en situación de vulnerabilidad social, tejido asociativo y profesionales de los diferentes departamentos de la administración local y autonómica (salud, bienestar social, igualdad, educación, urbanismo, medio ambiente, trabajo, etc.)                                                                                                                                                                                                                                                                                                                                                                                                                                                                                                                                                                     |
| <b>Incorporación de ejes de equidad</b>               | Género, clase social, edad, territorio, país de nacimiento y etnia (especial atención a la población gitana)                                                                                                                                                                                                                                                                                                                                                                                                                                                                                                                                                                                                                                                                                                            |
| <b>Técnicas de identificación de activos empleada</b> | Técnicas de investigación cualitativa: entrevistas individuales y grupales con ciudadanía y profesionales. Técnicas de discusión con agentes de salud y profesionales: trabajo en grupos y debate en pequeño grupo<br>Representación gráfica del mapa de activos para la salud con Google Earth                                                                                                                                                                                                                                                                                                                                                                                                                                                                                                                         |
| <b>Difusión de la información</b>                     | Informe del proceso de construcción y dinamización del mapa de activos para la salud de cada uno de los barrios<br>Presentación pública en Algemesí, en el Ayuntamiento de Alzira y en las Universidades de Valencia y Alicante                                                                                                                                                                                                                                                                                                                                                                                                                                                                                                                                                                                         |

|                                                           |                                                                                                                                                                                                                                                                                                                                                                                                                                                                                                                                                                                                                                                                                                                                                                                                                                                                                                                                                                                                                                                                                                                                                                                                   |
|-----------------------------------------------------------|---------------------------------------------------------------------------------------------------------------------------------------------------------------------------------------------------------------------------------------------------------------------------------------------------------------------------------------------------------------------------------------------------------------------------------------------------------------------------------------------------------------------------------------------------------------------------------------------------------------------------------------------------------------------------------------------------------------------------------------------------------------------------------------------------------------------------------------------------------------------------------------------------------------------------------------------------------------------------------------------------------------------------------------------------------------------------------------------------------------------------------------------------------------------------------------------------|
| <b>Dinamización de activos y acciones generadas</b>       | <p>La dinamización de los mapas de activos para la salud ha generado tres tipos de actuaciones:</p> <ol style="list-style-type: none"> <li>1. <i>Acciones de sensibilización comunitaria en el Projecte RIU</i> vinculadas al cuidado del entorno y espacio público y a la promoción del ejercicio físico: “Por un barrio más limpio y en movimiento”. Ver Facebook Projecte RIU</li> <li>2. <i>Proyecto Barri-Escola</i> dirigido a crear Espacios Barrio-Escuela como lugares de aprendizaje comunitario para niños, niñas y jóvenes del barrio, apoyar el proceso de Enseñanza Secundaria Obligatoria y promover la convivencia intercultural, intergeneracional y de igualdad de género. Gestionado por la asociación VinclesSalut. Más información en: <a href="http://www.vincles-salut.org/4.html">http://www.vincles-salut.org/4.html</a></li> <li>3. <i>Diseño del Plan Integral de Acción Comunitaria del barrio Raval de Sant Roc de Algemesí</i> que se lleva a cabo aplicando un método de investigación-acción participativa por un grupo de trabajo intersectorial formado por ciudadanía, tejido asociativo y personal técnico de la administración local y autonómica</li> </ol> |
| <b>Evaluación del proceso y de las acciones generadas</b> | <p>Evaluación del proceso de identificación y dinamización de los mapas de activos por el equipo técnico RIU en las reuniones de trabajo. La guía de preguntas utilizada en las entrevistas es una buena herramienta para identificar activos. Mejoras incorporadas: considerar activos en potencia, contar con profesionales de otros sectores y utilizar sistemas de geolocalización para la representación de activos (p.ej. Google maps).</p> <p>Evaluación multimétodo del proceso y resultados de las acciones: entrevistas grupales y análisis de redes sociales con agentes de salud; entrevistas grupales con profesionales de la Red Intersectorial RIU; indicadores de acceso a servicios de salud y programas</p>                                                                                                                                                                                                                                                                                                                                                                                                                                                                     |
| <b>Información complementaria sobre el proyecto</b>       | <p>Página web: <a href="http://fisabio.san.gva.es">http://fisabio.san.gva.es</a></p> <p>Buena práctica Ministerio de Sanidad. Disponible en: <a href="http://www.msssi.gob.es/organizacion/sns/planCalidadSNS/pdf/BBPP_2014/BBPP_APySR_C.Valenciana_4.pdf">http://www.msssi.gob.es/organizacion/sns/planCalidadSNS/pdf/BBPP_2014/BBPP_APySR_C.Valenciana_4.pdf</a></p> <p>Artículo Projecte RIU: Aviñó D, Paredes-Carbonell JJ, Peiró-Pérez R, La Parra D, Álvarez-Dardet C. Projecte RIU: cambios percibidos por agentes de salud y profesionales tras una intervención en salud en un barrio en situación de vulnerabilidad. <i>Aten Primaria</i>. 2014;46(10):531-40. Disponible en: <a href="http://www.elsevier.es/es-revista-atencion-primaria-27-resumen-iprojecte-i-riu-cambios-percibidos-por-90362343">http://www.elsevier.es/es-revista-atencion-primaria-27-resumen-iprojecte-i-riu-cambios-percibidos-por-90362343</a></p>                                                                                                                                                                                                                                                           |
|                                                           |                                                                                                                                                                                                                                                                                                                                                                                                                                                                                                                                                                                                                                                                                                                                                                                                                                                                                                                                                                                                                                                                                                                                                                                                   |

|                                                       |                                                                                                                                                                                                                                                                                                                                                                                                                                                                                                                                                                                                                                 |
|-------------------------------------------------------|---------------------------------------------------------------------------------------------------------------------------------------------------------------------------------------------------------------------------------------------------------------------------------------------------------------------------------------------------------------------------------------------------------------------------------------------------------------------------------------------------------------------------------------------------------------------------------------------------------------------------------|
| <b>Nombre del proyecto</b>                            | <b>4. Programa mihsalud: mujeres, infancia y hombres construyendo salud</b>                                                                                                                                                                                                                                                                                                                                                                                                                                                                                                                                                     |
| <b>Breve descripción</b>                              | Programa de movilización social y alta difusión en entornos urbanos dirigido a promover la salud, la convivencia y el acceso a los servicios de salud, de población en situación de vulnerabilidad mediante el trabajo en red con asociaciones y la formación-acción de agentes de salud de base comunitaria desde los Centros de Salud                                                                                                                                                                                                                                                                                         |
| <b>Lugar de realización</b>                           | Ciudad de Valencia                                                                                                                                                                                                                                                                                                                                                                                                                                                                                                                                                                                                              |
| <b>Equipo de trabajo</b>                              | Programa del Centro de Salud Pública de Valencia en colaboración con la Asociación ACOEC, el Ajuntament de València y Centros de Salud de los departamentos Dr. Peset y Clínic-Malva-rosa de la ciudad.<br>Médico y enfermera de salud pública, técnico coordinador de la asociación, dos enfermeras especialistas en enfermería familiar y comunitaria, cuatro agentes de salud de base comunitaria, red de agentes de salud de las asociaciones participantes, y profesionales de atención primaria, centros de salud sexual y reproductiva y servicios municipales (mujer, inmigración, juventud, drogodependencias, salud). |
| <b>Dimensión de salud en la que se trabaja</b>        | Global. La salud desde el modelo de los determinantes sociales en salud de la OMS                                                                                                                                                                                                                                                                                                                                                                                                                                                                                                                                               |
| <b>Población participante</b>                         | Personas de asociaciones "de" o que trabajan "con" población en situación de vulnerabilidad social (especialmente inmigrante y de etnia gitana) y población general, así como profesionales de diferentes sectores.                                                                                                                                                                                                                                                                                                                                                                                                             |
| <b>Incorporación de ejes de equidad</b>               | Es un programa de reducción de desigualdades con perspectiva de género e interculturalidad como ejes de la acción                                                                                                                                                                                                                                                                                                                                                                                                                                                                                                               |
| <b>Técnicas de identificación de activos empleada</b> | Entrevistas individuales y grupales con agentes de salud de las asociaciones, profesionales y directivos. Talleres con agentes de salud y profesionales (por separado y de manera conjunta).<br>Foros comunitarios. Concursos fotográficos. Exposiciones de fotografías de activos interactivas en asociaciones.                                                                                                                                                                                                                                                                                                                |
| <b>Difusión de la información</b>                     | Elaboración de un estudio sobre el proceso de elaboración del mapa de activos para la salud y la convivencia de la ciudad de Valencia. Realización de 11 exposiciones fotográficas en sedes de asociaciones. Presentación del mapa de activos en un Foro Comunitario realizado en la Escuela Valenciana de Estudios para la Salud (EVES) y en una jornada de investigación en enfermería del Hospital La Fe.                                                                                                                                                                                                                    |
| <b>Dinamización de activos y acciones</b>             | Acciones coordinadas entre activos identificados para la prevención de violencia de género en la ciudad, cuatro                                                                                                                                                                                                                                                                                                                                                                                                                                                                                                                 |



|                                                           |                                                                                                                                                                                                                                                                                                                                                                                                                                                                                                                                                                                                                                                                                                                                                                                                                                                            |
|-----------------------------------------------------------|------------------------------------------------------------------------------------------------------------------------------------------------------------------------------------------------------------------------------------------------------------------------------------------------------------------------------------------------------------------------------------------------------------------------------------------------------------------------------------------------------------------------------------------------------------------------------------------------------------------------------------------------------------------------------------------------------------------------------------------------------------------------------------------------------------------------------------------------------------|
| <b>generadas</b>                                          | encuentros inter-asociativos sobre "salud, sus determinantes y el papel de las asociaciones como activos", y nuevos proyectos de colaboración entre Centros de Salud y asociaciones que previamente no se conocían                                                                                                                                                                                                                                                                                                                                                                                                                                                                                                                                                                                                                                         |
| <b>Evaluación del proceso y de las acciones generadas</b> | Evaluación del proceso de elaboración del mapa de activos para la salud y la convivencia por el equipo del programa en reuniones de seguimiento y evaluación. El guión de preguntas para las entrevistas individuales y grupales se considera útil en la identificación de activos, aunque mejora si se utiliza en el contexto de un Taller en el que se aborda el concepto de salud y determinantes. Como limitaciones: necesidad de incorporar en el proceso a más directivos y tomadores de decisiones para impulsar las propuestas. Las memorias anuales y los informes de actividad recogen la evaluación del proceso y los resultados: entrevistas individuales y grupales con agentes de salud, profesionales y directivos; asociaciones participantes y líderes comunitarios implicados; indicadores cuantitativos de acceso a servicios de salud. |
| <b>Información complementaria sobre el proyecto</b>       | Vídeo "MIHsalud en SantMarcel·lí i La Font de Sant Lluís": <a href="https://www.youtube.com/watch?v=aU-fsa_p3ww">https://www.youtube.com/watch?v=aU-fsa_p3ww</a><br>Vídeo "Salud y participación ciudadana, mihsalud El Cabanyal": <a href="https://www.youtube.com/watch?v=bxMfQcsws1I">https://www.youtube.com/watch?v=bxMfQcsws1I</a><br>Facebook activos para la salud: <a href="https://www.facebook.com/Activos-para-la-Salud-492838040831675/">https://www.facebook.com/Activos-para-la-Salud-492838040831675/</a>                                                                                                                                                                                                                                                                                                                                  |
|                                                           |                                                                                                                                                                                                                                                                                                                                                                                                                                                                                                                                                                                                                                                                                                                                                                                                                                                            |

|                                                       |                                                                                                                                                                                                                                                                                                                                                                                                                                                                                                                          |
|-------------------------------------------------------|--------------------------------------------------------------------------------------------------------------------------------------------------------------------------------------------------------------------------------------------------------------------------------------------------------------------------------------------------------------------------------------------------------------------------------------------------------------------------------------------------------------------------|
| <b>Nombre del proyecto</b>                            | <b>5. Generación de mapas de activos de salud por población infantil de Cabra (Córdoba).</b>                                                                                                                                                                                                                                                                                                                                                                                                                             |
| <b>Breve descripción</b>                              | Mapeo comunitario producido por población infantil y juvenil para detectar, catalogar y compartir los activos de su salud en su municipio.                                                                                                                                                                                                                                                                                                                                                                               |
| <b>Lugar de realización</b>                           | Cabra (Córdoba)                                                                                                                                                                                                                                                                                                                                                                                                                                                                                                          |
| <b>Equipo de trabajo</b>                              | Observatorio de la Infancia de Cabra con profesionales de salud, educación y trabajo social que de forma voluntaria dinamizan el Consejo Local de la Infancia de Cabra (CLIC). El CLIC es un ámbito donde la infancia participa para tratar los problemas de su ciudad.                                                                                                                                                                                                                                                  |
| <b>Dimensión de salud en la que se trabaja</b>        | De forma global sobre todas las dimensiones de la salud.                                                                                                                                                                                                                                                                                                                                                                                                                                                                 |
| <b>Población participante</b>                         | Niños y niñas de entre 10 y 13 años de los centros educativos de primaria y secundaria de la localidad.                                                                                                                                                                                                                                                                                                                                                                                                                  |
| <b>Incorporación de ejes de equidad</b>               | Género, discapacidad, edad, nivel socioeconómico.                                                                                                                                                                                                                                                                                                                                                                                                                                                                        |
| <b>Técnicas de identificación de activos empleada</b> | A través de asambleas de clase utilizaban las técnicas de identificación recogidas en un banco de actividades: Búsqueda del tesoro. Detectives del barrio. Calendario histórico. Fotovoz. Historia de vida. MappingParty. Derivas. Entrevistas. Grupos de discusión. Análisis de las redes sociales.                                                                                                                                                                                                                     |
| <b>Difusión de la información</b>                     | Los productos del mapeo fueron los dibujos, fotografías y textos generados con los que se crearon murales, collages y montajes audiovisuales que fueron expuestos a la comunidad.                                                                                                                                                                                                                                                                                                                                        |
| <b>Dinamización de activos y acciones generadas</b>   | Elaboración de una batería de propuestas para trabajar en salud de la comunidad que fueron difundidas entre el claustro escolar y la corporación municipal.<br>Redacción y difusión de un manifiesto por parte del CLIC sobre la salud y la comunidad.<br>Desarrollo de acciones ligadas a las propuestas en cada centro educativo.<br>Desarrollo de acciones ligadas a las propuestas con la colaboración del ayuntamiento como la creación de un gran espacio de juegos y actividades, sostenible, seguro y accesible. |

|                                                           |                                                                                                                                                                                                                                                                                                                                                                                                                                                                                                                                                                                                                                                                                                                                                                                                                                                |
|-----------------------------------------------------------|------------------------------------------------------------------------------------------------------------------------------------------------------------------------------------------------------------------------------------------------------------------------------------------------------------------------------------------------------------------------------------------------------------------------------------------------------------------------------------------------------------------------------------------------------------------------------------------------------------------------------------------------------------------------------------------------------------------------------------------------------------------------------------------------------------------------------------------------|
| <b>Evaluación del proceso y de las acciones generadas</b> | <p>La evaluación del proceso se estableció con criterios relacionados con la actividad, la participación y la coordinación realizada a través de reuniones del equipo del proyecto. Los indicadores definidos fueron el número de actividades participativas incluidas en el banco, de participantes y centros educativos implicados y materiales de expresión y propuestas realizadas por los participantes.</p> <p>La evaluación de las acciones generadas se estableció a través de su consecución y de ciclos de mejora continua.</p>                                                                                                                                                                                                                                                                                                      |
| <b>Información complementaria sobre el proyecto</b>       | <p>Artículo: Díaz Expósito F. Generación de mapas de activos de salud por población infantil de una localidad de la Subbética Cordobesa. Comunidad 2014;16(1). Disponible en:<a href="http://comunidadsemfyc.es/generacion-de-mapas-de-activos-de-salud-por-poblacion-infantil-de-una-localidad-de-la-subbetica-cordobesa/">http://comunidadsemfyc.es/generacion-de-mapas-de-activos-de-salud-por-poblacion-infantil-de-una-localidad-de-la-subbetica-cordobesa/</a></p> <p>Facebook:<a href="https://www.facebook.com/ObservatorioInfanciaCabra">https://www.facebook.com/ObservatorioInfanciaCabra</a></p> <p>Slideshare:<a href="http://www.slideshare.net/fradiex/experiencias-de-identificacin-de-activos-salud-en-la-comunidad">http://www.slideshare.net/fradiex/experiencias-de-identificacin-de-activos-salud-en-la-comunidad</a></p> |
|                                                           |                                                                                                                                                                                                                                                                                                                                                                                                                                                                                                                                                                                                                                                                                                                                                                                                                                                |

|                                                       |                                                                                                                                                                                                                                                                                                                                                                                                                                                                                                                                                                                                                                                                                                                                                                                                                                                                                                                                 |
|-------------------------------------------------------|---------------------------------------------------------------------------------------------------------------------------------------------------------------------------------------------------------------------------------------------------------------------------------------------------------------------------------------------------------------------------------------------------------------------------------------------------------------------------------------------------------------------------------------------------------------------------------------------------------------------------------------------------------------------------------------------------------------------------------------------------------------------------------------------------------------------------------------------------------------------------------------------------------------------------------|
| <b>Nombre del proyecto</b>                            | <b>6. Recursos para tu Salud: Tu salud está en tu barrio</b>                                                                                                                                                                                                                                                                                                                                                                                                                                                                                                                                                                                                                                                                                                                                                                                                                                                                    |
| <b>Breve descripción</b>                              | Proyecto de promoción de salud de un centro de atención primaria de salud a partir de un diagnóstico comunitario participado llevado a cabo por los vecin@s del barrio, superando modelos bio-médicos y utilizando modelos salutogénicos y de activos en salud, y orientado a determinantes. El centro de Salud Oliver viene trabajando en actividades de promoción de la salud y salud comunitaria desde 1998 y en actividades de participación comunitaria desde 1990 con su consejo de salud. Para que todas estas actividades sean pertinentes, eficaces y se lleve a cabo una reorientación comunitaria del servicio sanitario y de su práctica individual y colectiva, se necesitaba un proyecto conjunto y para ello se crea " <b>Recursos para tu salud</b> ".                                                                                                                                                          |
| <b>Lugar de realización</b>                           | Zona Básica de Salud Centro de Salud Oliver, Barrio Oliver (Zaragoza )                                                                                                                                                                                                                                                                                                                                                                                                                                                                                                                                                                                                                                                                                                                                                                                                                                                          |
| <b>Equipo de trabajo</b>                              | Comisión de Salud Comunitaria de Centro de Salud Oliver con colaboración resto profesionales del EAP y del Consejo de Salud de Oliver.                                                                                                                                                                                                                                                                                                                                                                                                                                                                                                                                                                                                                                                                                                                                                                                          |
| <b>Dimensión de salud en la que se trabaja</b>        | <b>Global. La salud desde el modelo de los determinantes sociales en salud de la OMS</b><br><b>Objetivos en salud que se plantea el proyecto:</b> -Empoderar la población potenciando la salud positiva -Conocer, difundir, prescribir recursos comunitarios. -Promover la utilización adecuada de los recursos sanitarios -Conocer, potenciar y colaborar con redes/participación comunitaria. -Trabajar desde determinantes salud: det. sociales, estilos de vida positivos, medioambiente, entornos. -Potenciar reorientación comunitaria prestación servicio sanitario (consulta individual-servicio-comunidad), formación, investigación, docencia, clima positivo y cohesión equipo centro de salud (activos del EAP)<br><b>Contenidos del proyecto:</b> -Conocimiento recursos comunitarios y sanitarios. Prescripción recursos.-Estilos vida-Control estrés-Cohesión equipo -Actividad Física-Participación Comunitaria |
| <b>Población participante</b>                         | Población de la Zona Básica de Salud del Centro de Salud Oliver                                                                                                                                                                                                                                                                                                                                                                                                                                                                                                                                                                                                                                                                                                                                                                                                                                                                 |
| <b>Incorporación de ejes de equidad</b>               | Teniendo en cuenta los determinantes sociales de la salud de la O.M.S. para alcanzar el mayor nivel de salud posible a lo largo de todo el proceso                                                                                                                                                                                                                                                                                                                                                                                                                                                                                                                                                                                                                                                                                                                                                                              |
| <b>Técnicas de identificación de activos empleada</b> | -Mapeo Activos( <i>Mapeando Oliver</i> ) MappingParty, Mapa de activos proyectos en los que se participa o colabora.<br>-Colaboración proyectos y/o recursos Barrio " <i>Tu salud en tu barrio</i> ".                                                                                                                                                                                                                                                                                                                                                                                                                                                                                                                                                                                                                                                                                                                           |

|                                                           |                                                                                                                                                                                                                                                                                                                                                                                                                                                                                                                                                                                                                                                                                                                                                                                                                                                                                                    |
|-----------------------------------------------------------|----------------------------------------------------------------------------------------------------------------------------------------------------------------------------------------------------------------------------------------------------------------------------------------------------------------------------------------------------------------------------------------------------------------------------------------------------------------------------------------------------------------------------------------------------------------------------------------------------------------------------------------------------------------------------------------------------------------------------------------------------------------------------------------------------------------------------------------------------------------------------------------------------|
|                                                           | <ul style="list-style-type: none"> <li>-Acercar el Centro de Salud como un recurso a la población (visita al EAP pob. adulta) ( activos en salud en la infancia: Cuentacuentos Dr. Guau)</li> <li>-Prescripción recursos comunitarios</li> <li>- Actividad física “Paseos y Salud”, “Guía Actividad Física Familias”</li> <li>-Participación Campaña Oliver limpio y amable</li> <li>-Participación comunitaria “EnREDados en Oliver”: Comisión Salud Comunitaria Oliver,Mesa agentes del barrio, Consejo Salud</li> <li>-“Lecturas y salud” Identificación activos individuales y colectivos a través de la lectura. Colaboración con proyecto Centro Comunitario Oliver</li> <li>-Creando equipo: activos salud en centro de salud.</li> </ul>                                                                                                                                                   |
| <b>Difusión de la información</b>                         | En el Consejo de Salud, en la Mesa de Agentes del Barrio Oliver, Centro Comunitario, Fiesta de otoño Barrio Oliver en 2013-14 y 15, Jornadas RAPPs 2014, II Jornadas Consejos de Salud de Aragón Octubre 2014, Jornadas de Calidad del SALUD -innovación en Promoción de Salud-, Master de Salud Pública 2014, Jornadas RAPPs 2015,Jornadas interdisciplinarias de Salud Comunitaria en zaragoza.-noviembre 2015, Campaña Oliver limpio y amable.Blog del PACAP Aragón y blog de la RAPPs.                                                                                                                                                                                                                                                                                                                                                                                                         |
| <b>Dinamización de activos y acciones generadas</b>       | <p>Mapeos realizados en fiesta de otoño de forma lúdica y participativa. A nivel individual en consultas y por otros agentes y recursos del barrio.</p> <p>Las acciones generadas han sido paseos y salud ; participación campaña por un barrio limpio y amable, lecturas y salud. Transmisión de la visión de salud positiva a la población y del concepto de activos.</p>                                                                                                                                                                                                                                                                                                                                                                                                                                                                                                                        |
| <b>Evaluación del proceso y de las acciones generadas</b> | <p>Pendiente de evaluación del proceso en global. las actividades se evalúa de forma continua mediante entrevistas individuales y grupales en cafés-saludables, trabajando junto a la población reflexión-acción-participación.</p> <p>Reuniones del equipo de trabajo</p>                                                                                                                                                                                                                                                                                                                                                                                                                                                                                                                                                                                                                         |
| <b>Información complementaria sobre el proyecto</b>       | <p>Red Aragonesa de Proyectos de Promoción de Salud</p> <p><a href="http://redaragonesaproyectospromocionsalud.blogspot.com.es/2014/12/recursos-para-tu-saludcentro-de-salud.html">http://redaragonesaproyectospromocionsalud.blogspot.com.es/2014/12/recursos-para-tu-saludcentro-de-salud.html</a></p> <p>Mapeando Oliver un proceso activo y de activos</p> <p><a href="https://entusiasmoinconsciente.wordpress.com/2015/06/25/mapeando-oliver-un-proceso-activo-y-de-activos/">https://entusiasmoinconsciente.wordpress.com/2015/06/25/mapeando-oliver-un-proceso-activo-y-de-activos/</a></p> <p>Vídeos:</p> <p>Mapeando Oliver:</p> <p><a href="https://www.youtube.com/watch?v=W2O-3fkWqNQ">https://www.youtube.com/watch?v=W2O-3fkWqNQ</a></p> <p>El Árbol Salud Oliver:</p> <p><a href="https://www.youtube.com/watch?v=X_mXOrOVZpA">https://www.youtube.com/watch?v=X_mXOrOVZpA</a></p> |

|  |  |
|--|--|
|  |  |
|  |  |

|                                                       |                                                                                                                                                                                                                                                                                                                                                                                                                                                                                                                                                                                              |
|-------------------------------------------------------|----------------------------------------------------------------------------------------------------------------------------------------------------------------------------------------------------------------------------------------------------------------------------------------------------------------------------------------------------------------------------------------------------------------------------------------------------------------------------------------------------------------------------------------------------------------------------------------------|
| <b>Nombre del proyecto</b>                            | <b>7. Revitalización de un Consejo de Salud: Renovarse o morir</b>                                                                                                                                                                                                                                                                                                                                                                                                                                                                                                                           |
| <b>Breve descripción</b>                              | Desde su constitución en el año 2009 , el consejo de salud es un órgano pasivo e informativo. En el año 2015, se propone la realización de un diagnóstico de salud como herramienta para dinamizar y priorizar líneas de trabajo que mejoren la salud en el concejo de Parres . Para ello, se convocan distintos agentes locales de salud y tras una estratificación de la población se deciden técnicas cuantitativas y cualitativas para la detección de problemas relevantes y mediante una puesta en común se deciden líneas de actuación para mejorar el bienestar de los parraquenses. |
| <b>Lugar de realización</b>                           | Parres                                                                                                                                                                                                                                                                                                                                                                                                                                                                                                                                                                                       |
| <b>Equipo de trabajo</b>                              | Consejo de Salud de Parres                                                                                                                                                                                                                                                                                                                                                                                                                                                                                                                                                                   |
| <b>Dimensión de salud en la que se trabaja</b>        | Global. La salud desde el modelo de los determinantes sociales en salud de la OMS                                                                                                                                                                                                                                                                                                                                                                                                                                                                                                            |
| <b>Población participante</b>                         | Toda la población del Concejo de Parres                                                                                                                                                                                                                                                                                                                                                                                                                                                                                                                                                      |
| <b>Incorporación de ejes de equidad</b>               | Se han tenido en cuenta los determinantes sociales en el análisis de situación de salud. Se ha estratificado el análisis para recoger información de mujeres, ámbito rural e infancia.<br>Las herramientas para realizar el análisis en las asociaciones de mujeres han sido diseñadas por ellas mismas.                                                                                                                                                                                                                                                                                     |
| <b>Técnicas de identificación de activos empleada</b> | Mapeo a través del Observatorio de Salud en Asturias., Grupo focal, entrevistas a informadores clave, cuestionarios desde asociaciones, y documentos estratégicos (plan de infancia y sistemas de información autonómicos....)                                                                                                                                                                                                                                                                                                                                                               |
| <b>Difusión de la información</b>                     | A través del Consejo de Salud y pendiente desarrollar el resto de acciones planteadas desde el Consejo para llegar a toda la población.                                                                                                                                                                                                                                                                                                                                                                                                                                                      |
| <b>Dinamización de activos y acciones generadas</b>   | -Reconvertimos un Consejo de Salud pasivo e individualista en un Consejo cohesionado, coordinado y activo.<br>-A través de la realización de las intervenciones del propio diagnóstico de salud (entrevistas, mapeo, etc).<br>-Líneas de trabajo propuestas a desarrollar a partir del diagnóstico de salud como por ejemplo un Logo del Consejo para su difusión y sentimiento de pertenencia a grupo; potenciación de sendas rurales y urbanas del Concejo y mejora                                                                                                                        |

|                                                           |                                                                                                                                                                                                                                                                                                                                                                                                                                                                                                                                                                                                                                                                                                                                                                                                                                                                                                                                                                   |
|-----------------------------------------------------------|-------------------------------------------------------------------------------------------------------------------------------------------------------------------------------------------------------------------------------------------------------------------------------------------------------------------------------------------------------------------------------------------------------------------------------------------------------------------------------------------------------------------------------------------------------------------------------------------------------------------------------------------------------------------------------------------------------------------------------------------------------------------------------------------------------------------------------------------------------------------------------------------------------------------------------------------------------------------|
|                                                           | de las mismas para su aprovechamiento; coordinación entre asociaciones, servicio de salud y ayuntamiento; análisis de los indicadores cuyos datos despertaron preocupación en el propio Consejo; visualización de los servicios sociales y potenciación del conocimiento de recursos comunitario.                                                                                                                                                                                                                                                                                                                                                                                                                                                                                                                                                                                                                                                                 |
| <b>Evaluación del proceso y de las acciones generadas</b> | <p>-Se propuso y se consiguió mejorar el grado de satisfacción de los miembros de Consejo.</p> <p>-Se propuso aumentar la implicación y nivel de actividad de los miembros. Se consiguió, participando casi todos en las intervenciones propuestas y posteriormente siendo ellos los que proponen y organizan nuevas intervenciones comunitarias.</p> <p>-Se propuso mejorar la coordinación y cohesión del Consejo y se consiguió mejorando la comunicación y facilitando canales para ello.</p> <p>-Era necesario reestructurar el Consejo de Salud tanto en personal como en manera de plantear los proyectos. Definimos roles y líneas de trabajo con sus objetivos claros y su metodología, asequible para todos los miembros, acordada entre todos, factible y con visibilidad. Se consiguió realizando un análisis de situación de salud e implantando dinámicas de trabajo para el planteamiento adecuado de proyectos de manera práctica y realista.</p> |
| <b>Información complementaria sobre el proyecto</b>       | <p>Información sobre los activos y actividades identificadas en Parres:</p> <p><a href="http://www.obsaludasturias.com/obsa/asturias-actua/">http://www.obsaludasturias.com/obsa/asturias-actua/</a></p>                                                                                                                                                                                                                                                                                                                                                                                                                                                                                                                                                                                                                                                                                                                                                          |
|                                                           |                                                                                                                                                                                                                                                                                                                                                                                                                                                                                                                                                                                                                                                                                                                                                                                                                                                                                                                                                                   |



|                                                       |                                                                                                                                                                                                                                                                                                                                                                                                                                                                                                                                                                                |
|-------------------------------------------------------|--------------------------------------------------------------------------------------------------------------------------------------------------------------------------------------------------------------------------------------------------------------------------------------------------------------------------------------------------------------------------------------------------------------------------------------------------------------------------------------------------------------------------------------------------------------------------------|
| <b>Nombre del proyecto</b>                            | <b>8. Mapas de activos de salud por mujeres en situación de vulnerabilidad en el Área de Gestión Sanitaria del Sur de Córdoba.</b>                                                                                                                                                                                                                                                                                                                                                                                                                                             |
| <b>Breve descripción</b>                              | El marco de la estrategia grupos socioeducativos de atención primaria de salud, GRUSE, pretende potenciar las habilidades y talentos de las personas implicadas e incrementar su capacidad de afrontamiento ante situaciones cotidianas. En este contexto se plantea la generación de mapas de activos de salud realizados por mujeres que forman parte de los GRUSE en cada unidad de gestión clínica (UGC) de atención primaria de salud del área. El trabajo se estructuró en 5 pasos: definir el grupo, reunir e informar, dinamizar, identificar y compartir los activos. |
| <b>Lugar de realización</b>                           | Territorio de influencia de cada una de las unidades de gestión clínica de atención primaria de salud del Área de Gestión Sanitaria del Sur de Córdoba.                                                                                                                                                                                                                                                                                                                                                                                                                        |
| <b>Equipo de trabajo</b>                              | El equipo de trabajo de Atención Primaria del centro de salud con el personal de enfermería, médico y de trabajo social. Se establecía al trabajador o trabajadora social como responsable del equipo y de otras personas encargadas de la dinamización de la promoción de salud en la UGC.                                                                                                                                                                                                                                                                                    |
| <b>Dimensión de salud en la que se trabaja</b>        | De forma global sobre todas las dimensiones de la salud.                                                                                                                                                                                                                                                                                                                                                                                                                                                                                                                       |
| <b>Población participante</b>                         | Mujeres adultas que acuden a consulta al centro de salud y necesitan apoyo para enfrentarse a la vida diaria con mayores oportunidades de éxito.                                                                                                                                                                                                                                                                                                                                                                                                                               |
| <b>Incorporación de ejes de equidad</b>               | Incorporación a lo largo del proceso centrado en la participación de las mujeres.                                                                                                                                                                                                                                                                                                                                                                                                                                                                                              |
| <b>Técnicas de identificación de activos empleada</b> | Las dinámicas grupales se apoyaron distintas técnicas participativas del manual GRUSE. Se utilizaron mapas mudos que sirvieron para situar los activos y provocar reflexión posterior entre las participantes.                                                                                                                                                                                                                                                                                                                                                                 |
| <b>Difusión de la información</b>                     | Exposición de murales con los mapas de activos de salud en el centro de salud.<br>Visibilización de los activos en la web.                                                                                                                                                                                                                                                                                                                                                                                                                                                     |

|                                                           |                                                                                                                                                                                                                                                                                                                                                                                                                                                                                                                                                                                                                                                                                                                                                                           |
|-----------------------------------------------------------|---------------------------------------------------------------------------------------------------------------------------------------------------------------------------------------------------------------------------------------------------------------------------------------------------------------------------------------------------------------------------------------------------------------------------------------------------------------------------------------------------------------------------------------------------------------------------------------------------------------------------------------------------------------------------------------------------------------------------------------------------------------------------|
| <b>Dinamización de activos y acciones generadas</b>       | <p>Elaboración de un informe tras la exposición de los mapas con las nuevas aportaciones de las personas que lo habían observado siendo mostrado en la web y a los órganos decisores.</p> <p>Cada uno de los equipos de trabajo de los centros de salud conectó los activos con mejorar la actividad física en las familias y especialmente en la infancia. En este sentido daba respuesta a un objetivo del plan de promoción de la actividad física y alimentación equilibrada y del plan integral de obesidad infantil de Andalucía que pretendía obtener un catálogo de recursos para la actividad física. Se creó dicho catálogo a partir del mapeo de las mujeres y se difundió entre los profesionales para que lo indicasen en su trabajo diario en consulta.</p> |
| <b>Evaluación del proceso y de las acciones generadas</b> | <p>La evaluación del proceso se realizó valorando la dinámica, la participación y las sugerencias al finalizar las dinámicas grupales. Las acciones generadas relacionadas con el catálogo y su utilización se van evaluando y planteando objetivos para la siguiente etapa de trabajo.</p>                                                                                                                                                                                                                                                                                                                                                                                                                                                                               |
| <b>Información complementaria sobre el proyecto</b>       | <p>Manual para el diseño e implementación de grupos socioeducativos en Atención Primaria (GRUSE): <a href="http://bit.ly/1ZN1YVX">http://bit.ly/1ZN1YVX</a></p> <p>Anexos del manual para el diseño e implementación de grupos socioeducativos en Atención Primaria (GRUSE): <a href="http://bit.ly/1PFEOGg">http://bit.ly/1PFEOGg</a></p> <p>Slideshare: <a href="http://www.slideshare.net/fradiex/experiencias-de-identificacin-de-activos-salud-en-la-comunidad">http://www.slideshare.net/fradiex/experiencias-de-identificacin-de-activos-salud-en-la-comunidad</a></p> <p>Blog del proyecto: <a href="http://activosdesalud.blogspot.com.es/">http://activosdesalud.blogspot.com.es/</a></p>                                                                       |
|                                                           |                                                                                                                                                                                                                                                                                                                                                                                                                                                                                                                                                                                                                                                                                                                                                                           |

|                                                |                                                                                                                                                                                                                                                                                                                                                                                                                                                                                                                                                                                                                                                                                                                                                                                                                                                                                                                                                                                                                                                                                                                                                                                                                                                         |
|------------------------------------------------|---------------------------------------------------------------------------------------------------------------------------------------------------------------------------------------------------------------------------------------------------------------------------------------------------------------------------------------------------------------------------------------------------------------------------------------------------------------------------------------------------------------------------------------------------------------------------------------------------------------------------------------------------------------------------------------------------------------------------------------------------------------------------------------------------------------------------------------------------------------------------------------------------------------------------------------------------------------------------------------------------------------------------------------------------------------------------------------------------------------------------------------------------------------------------------------------------------------------------------------------------------|
| <b>Nombre del proyecto</b>                     | <b>9. FIS: Mapa de activos: ciudadanía, profesionales políticos identificando espacios de oportunidad para mejorar la salud de la población.</b>                                                                                                                                                                                                                                                                                                                                                                                                                                                                                                                                                                                                                                                                                                                                                                                                                                                                                                                                                                                                                                                                                                        |
| <b>Breve descripción</b>                       | Estudio cuantitativo-cualitativo de identificación de activos para la salud con informantes clave en cuatro barrios de Alicante con diferente nivel socio-económico, mediante investigación acción participativa, a través de sesiones de entrevistas grupales y sesiones de discurso grupal en profundidad de la ciudadanía, profesionales y responsables de política local.<br>Proyecto con Fondos de Investigación en Salud (2013-2016).                                                                                                                                                                                                                                                                                                                                                                                                                                                                                                                                                                                                                                                                                                                                                                                                             |
| <b>Lugar de realización</b>                    | Cuatro barrios de la ciudad de Alicante, con diferente clase socioeconómica, Virgen del Remedio, (clase socioeconómica -SE- baja), Benalúa (clase SE media), Centro (clase SE alta) y Casco Histórico aledaño a la zona Centro (Clase SE media baja), son barrios diferentes por su población extranjera y tipología urbanística.                                                                                                                                                                                                                                                                                                                                                                                                                                                                                                                                                                                                                                                                                                                                                                                                                                                                                                                       |
| <b>Equipo de trabajo</b>                       | El equipo investigador está formado por profesionales expertos de diferentes disciplinas ligadas a los objetivos del proyecto, como la promoción de la salud, el envejecimiento, psicología, medio ambiente, urbanismo y comunicación.<br>El equipo liderado por el investigador principal (Catedrático de Medicina Preventiva y Salud Pública de la UA e investigador de CIBERESP), está formado por diferentes investigadores colaboradores: Director asociado del Centre forPublicHealthExcellence del NationalInstitute of Health → ClinicalExcellence (NICE), Decana de la Facultad de Ciencias de la Salud (UA), Catedrática de comunicación (UA), Catedrática de Análisis Geográficos Regional (UA), Director proyecto Universidades Saludables (UA), Director General de Salud Pública de Asturias y dos Investigadores de la Fundación para la Investigación Sanitaria y Biomética de la Comunidad Valenciana (FISABIO).<br>El proyecto cuenta con el asesoramiento internacional de: miembro de la WHO European Office forInvestmentforHealth and Development (Venecia, Italia) , Catedrática de Salud Pública (UA), Doctora en Salud Pública (Universidad de Cuenca, Ecuador) y Doctora en Salud Pública (Universidad de Concepción, Chile). |
| <b>Dimensión de salud en la que se trabaja</b> | De forma global sobre todas las dimensiones de la salud.                                                                                                                                                                                                                                                                                                                                                                                                                                                                                                                                                                                                                                                                                                                                                                                                                                                                                                                                                                                                                                                                                                                                                                                                |
| <b>Población participante</b>                  | Ciudadanía, profesionales que viven o trabajan en los barrios del estudio, profesionales de ayuntamiento que trabajan en la zona y responsables de la política local de gobierno de la ciudad de Alicante.                                                                                                                                                                                                                                                                                                                                                                                                                                                                                                                                                                                                                                                                                                                                                                                                                                                                                                                                                                                                                                              |
| <b>Incorporación de ejes de equidad</b>        | Clase social, género, territorio y país de nacimiento                                                                                                                                                                                                                                                                                                                                                                                                                                                                                                                                                                                                                                                                                                                                                                                                                                                                                                                                                                                                                                                                                                                                                                                                   |

|                                                           |                                                                                                                                                                                                                                                                                                                                                                                                                                                                                                                                                                                                                                                                                                                                                                                                                                                                                                                                                                                                                                                                                                                                                                                                                                                                                                        |
|-----------------------------------------------------------|--------------------------------------------------------------------------------------------------------------------------------------------------------------------------------------------------------------------------------------------------------------------------------------------------------------------------------------------------------------------------------------------------------------------------------------------------------------------------------------------------------------------------------------------------------------------------------------------------------------------------------------------------------------------------------------------------------------------------------------------------------------------------------------------------------------------------------------------------------------------------------------------------------------------------------------------------------------------------------------------------------------------------------------------------------------------------------------------------------------------------------------------------------------------------------------------------------------------------------------------------------------------------------------------------------|
| <b>Técnicas de identificación de activos empleada</b>     | Varias, desde análisis documental con búsqueda de asociaciones del campo de estudio en el registro de asociaciones del Ministerio del Interior y registro municipal de entidades, entrevistas estructuradas individuales y grupales, técnica de triangulación para identificar informantes clave, hasta técnicas de discurso grupal.                                                                                                                                                                                                                                                                                                                                                                                                                                                                                                                                                                                                                                                                                                                                                                                                                                                                                                                                                                   |
| <b>Difusión de la información</b>                         | <p>A través de tecnologías de la información, se desarrollará un instrumento visual (Google Earth Pro) para la impresión de calidad, que puede ser utilizado posteriormente para establecer estrategias para la participación. Además se realizará un video promocional del proyecto y de los activos de salud de la Ciudad de Alicante. Con diferentes ejes de actuación:</p> <p>a) Comunicación para movilización de beneficiarios: orientada a la información de la ciudadanía mediante capacitación, conformación de grupos comunitarios y comunicación por medios tradicionales y masivos y por medio de TICS.</p> <p>b) Comunicación para la movilización política y gubernamental: dirigida a las autoridades y decisores, a través de la web del ayuntamiento, Alianza 21 de la diputación de Alicante.</p> <p>c) Comunicación para la movilización comunitaria: orientada a lograr el compromiso de líderes tradicionales, asociaciones, que se conviertan en fuentes e informadores clave y entes esenciales en la planificación de actividades y difusión de conocimientos, a través de la Red Hospitalaria Comunitaria y el Observatorio Salud Asturias.</p> <p>d) Comunicación para la movilización corporativa: que buscará el apoyo de empresas. Plan de Publicaciones Científicas.</p> |
| <b>Dinamización de activos y acciones generadas</b>       | En proceso                                                                                                                                                                                                                                                                                                                                                                                                                                                                                                                                                                                                                                                                                                                                                                                                                                                                                                                                                                                                                                                                                                                                                                                                                                                                                             |
| <b>Evaluación del proceso y de las acciones generadas</b> | En proceso                                                                                                                                                                                                                                                                                                                                                                                                                                                                                                                                                                                                                                                                                                                                                                                                                                                                                                                                                                                                                                                                                                                                                                                                                                                                                             |
| <b>Información complementaria sobre el proyecto</b>       | <p>FIS PI13/02410: Mapa de activos: ciudadanía, profesionales políticos identificando espacios de oportunidad para mejorar la salud de la población. Fondo Investigación en Salud. Instituto de Salud Carlos III</p> <p>Disponible en: <a href="https://portalfis.isciii.es/es/Paginas/DetalleProyecto.aspx?idProyecto=PI13%2f02410">https://portalfis.isciii.es/es/Paginas/DetalleProyecto.aspx?idProyecto=PI13%2f02410</a></p> <p>Alvarez-Dardet C, Morgan A, Ruiz-Cantero MT, Hernán M. (2015). Improving the evidence base on public health assets—the way ahead: a proposed research agenda. <i>Journal of epidemiology and community health</i>, jech-2014. Disponible en: <a href="https://www.researchgate.net/profile/Carlos-Alvarez-Dardet/publication/274258534_Improving_the_evidence_base_on_public_health_assets-the_way_ahead_a_proposed_research_agenda/links/551ce8f10cf2909047bcb1db.pdf">https://www.researchgate.net/profile/Carlos-Alvarez-Dardet/publication/274258534_Improving_the_evidence_base_on_public_health_assets-the_way_ahead_a_proposed_research_agenda/links/551ce8f10cf2909047bcb1db.pdf</a>.</p>                                                                                                                                                                  |

|                                                       |                                                                                                                                                                                                                                                                                                                                                                                                                                                                                                                                                                                                                                                                                                                                                                                                                                                                                                                             |
|-------------------------------------------------------|-----------------------------------------------------------------------------------------------------------------------------------------------------------------------------------------------------------------------------------------------------------------------------------------------------------------------------------------------------------------------------------------------------------------------------------------------------------------------------------------------------------------------------------------------------------------------------------------------------------------------------------------------------------------------------------------------------------------------------------------------------------------------------------------------------------------------------------------------------------------------------------------------------------------------------|
| <b>Nombre del proyecto</b>                            | <b>10. Salud Comunitaria basada en activos en Cataluña</b>                                                                                                                                                                                                                                                                                                                                                                                                                                                                                                                                                                                                                                                                                                                                                                                                                                                                  |
| <b>Breve descripción</b>                              | <p>Proyectos de salud comunitaria, liderados por Atención Primària de Salud conjuntamente con Salud Pública, en diferentes municipios y barrios de Cataluña Como parte de la metodología del proceso de salud comunitaria se lleva a cabo la identificación participativa de activos en salud. Desde 2005 diversos programas de soporte a la Salud Comunitaria han incorporado la identificación de activos:</p> <ul style="list-style-type: none"> <li>- Salud en los Barrios (desde 2005) realizado en 74 barrios vulnerables en el marco de la Ley de Barrios</li> <li>- Agentes de Salud Comunitaria, ASACO (desde 2012) en 3 municipios del Bages.</li> <li>- Plan Interdepartamental de Salud Pública: <ul style="list-style-type: none"> <li>- Prescripción Social (desde 2012)</li> <li>- Orientando la Atención Primaria a la Comunidad, COMSalut (desde 2014) en 16 Àreas Bàsicas de Salud</li> </ul> </li> </ul> |
| <b>Lugar de realización</b>                           | Municipios y barrios de Cataluña                                                                                                                                                                                                                                                                                                                                                                                                                                                                                                                                                                                                                                                                                                                                                                                                                                                                                            |
| <b>Equipo de trabajo</b>                              | A nivel local Agencia de Salud Pública de Cataluña (Barcelona), Àreas Bàsicas de Salud, Municipios (àrea de Salud, Servicios Sociales, otros) y comunidad                                                                                                                                                                                                                                                                                                                                                                                                                                                                                                                                                                                                                                                                                                                                                                   |
| <b>Dimensión de salud en la que se trabaja</b>        | Salud como producto de determinantes sociales (exposición a determinadas condiciones estructurales derivan en unas condiciones de vida concretas y unas condiciones de salud), con diferencias en la exposición a los mismos según ejes de desigualdad. Salutogénesis.                                                                                                                                                                                                                                                                                                                                                                                                                                                                                                                                                                                                                                                      |
| <b>Población participante</b>                         | La población de los barrios donde se llevan a cabo los procesos comunitarios.                                                                                                                                                                                                                                                                                                                                                                                                                                                                                                                                                                                                                                                                                                                                                                                                                                               |
| <b>Incorporación de ejes de equidad</b>               | La equidad es uno de los ejes de los procesos comunitarios. Incorporación de todas las voces que existen en la comunidad en las dinámicas participativas para la identificación de necesidades y activos. Complementado con entrevistas individuales a informantes clave o con preguntas específicas sobre grupos culturales o socioeconómicos vulnerables.                                                                                                                                                                                                                                                                                                                                                                                                                                                                                                                                                                 |
| <b>Técnicas de identificación de activos empleada</b> | Mayoritariamente mediante entrevistas grupales (comunidad) y grupos focales (profesionales). En Sallent se llevó a cabo una recogida de activos en la comunidad mediante buzones instalados en diversos puntos del pueblo (ink)                                                                                                                                                                                                                                                                                                                                                                                                                                                                                                                                                                                                                                                                                             |
| <b>Difusión de la información</b>                     | Difusión a través del web, boletines de barrio, reuniones de vecinos. Participación en jornadas y congresos                                                                                                                                                                                                                                                                                                                                                                                                                                                                                                                                                                                                                                                                                                                                                                                                                 |

|                                                           |                                                                                                                                                                                                                                                                                                                                                            |
|-----------------------------------------------------------|------------------------------------------------------------------------------------------------------------------------------------------------------------------------------------------------------------------------------------------------------------------------------------------------------------------------------------------------------------|
| <b>Dinamización de activos y acciones generadas</b>       | Los activos identificados se conectan con las necesidades priorizadas en el proceso comunitario a la hora de definir intervenciones. Difusión de los activos para su uso por parte de los agentes comunitarios (por ejemplo para la prescripción social)                                                                                                   |
| <b>Evaluación del proceso y de las acciones generadas</b> | Evaluación del proceso y de las intervenciones derivadas para cada barrio/municipio. Además en 2012 se realizó una encuesta de satisfacción a profesionales implicados en Salud en los Barrios.                                                                                                                                                            |
| <b>Información complementaria sobre el proyecto</b>       | Salud en los Barrios (desde 2005)<br><ul style="list-style-type: none"> <li>- <a href="#">Cataluña</a></li> <li>- <a href="#">Barcelona</a> y <a href="#">vídeo</a></li> </ul> <a href="#">ASACO- Sallent (desde 2012)</a> // <a href="#">vídeo</a><br>COMSalut (desde 2014) <a href="https://comsalut.wordpress.com/">https://comsalut.wordpress.com/</a> |
|                                                           |                                                                                                                                                                                                                                                                                                                                                            |

|                                                           |                                                                                                                                                                                                                                                                                                                                                             |
|-----------------------------------------------------------|-------------------------------------------------------------------------------------------------------------------------------------------------------------------------------------------------------------------------------------------------------------------------------------------------------------------------------------------------------------|
| <b>Nombre del proyecto</b>                                | <b>11. Plan Interdepartamental de Salud Pública de Cataluña</b>                                                                                                                                                                                                                                                                                             |
| <b>Breve descripción</b>                                  | Aprobado por el gobierno en 2014, impulsa actuaciones interdepartamentales para la mejora de los determinantes sociales de la salud desde políticas no de salud. Ejemplos de intervenciones en marcha son los proyectos: Letras y salud, nacidos para leer, HelloFruits                                                                                     |
| <b>Lugar de realización</b>                               | Cataluña                                                                                                                                                                                                                                                                                                                                                    |
| <b>Equipo de trabajo</b>                                  | Comisión Interdepartamental y grupos de trabajo específicos                                                                                                                                                                                                                                                                                                 |
| <b>Dimensión de salud en la que se trabaja</b>            | Salud como producto de determinantes sociales (exposición a determinadas condiciones estructurales derivan en unas condiciones de vida concretas y unas condiciones de salud), con diferencias en la exposición a los mismos según ejes de desigualdad. Salutogénesis.                                                                                      |
| <b>Población participante</b>                             | Población de Catalunya                                                                                                                                                                                                                                                                                                                                      |
| <b>Incorporación de ejes de equidad</b>                   | La equidad es uno de los ejes de los procesos comunitarios. Incorporación de todas las voces que existen en la comunidad en las dinámicas participativas para la identificación de necesidades y activos. Complementado con entrevistas individuales a informantes clave o con preguntas específicas sobre grupos culturales o socioeconómicos vulnerables. |
| <b>Técnicas de identificación de activos empleada</b>     | A partir de propuestas de cada Departamento, entes locales y entidades.                                                                                                                                                                                                                                                                                     |
| <b>Difusión de la información</b>                         | Jornadas, webs, documentos, videos.                                                                                                                                                                                                                                                                                                                         |
| <b>Dinamización de activos y acciones generadas</b>       | Búsqueda activa, a través de equipos de salud pública territoriales se identifican recursos que puedan llevar a cabo las intervenciones /participar                                                                                                                                                                                                         |
| <b>Evaluación del proceso y de las acciones generadas</b> | Indicadores PINSAP                                                                                                                                                                                                                                                                                                                                          |
| <b>Información complementaria sobre el proyecto</b>       | <a href="#">Documento base PINSAP</a><br><a href="#">Documento de Balance del primer año</a><br><a href="#">Video PINSAP</a> y <a href="#">video balance primer año</a>                                                                                                                                                                                     |

|  |  |
|--|--|
|  |  |
|--|--|

|                                                       |                                                                                                                                                                                                                                                                                                                                                                                                                                                                                                                                                                                                                                                                                                                                                                                                                                                |
|-------------------------------------------------------|------------------------------------------------------------------------------------------------------------------------------------------------------------------------------------------------------------------------------------------------------------------------------------------------------------------------------------------------------------------------------------------------------------------------------------------------------------------------------------------------------------------------------------------------------------------------------------------------------------------------------------------------------------------------------------------------------------------------------------------------------------------------------------------------------------------------------------------------|
| <b>Nombre del proyecto</b>                            | <b>12. Red Aragonesa de Proyectos de Promoción de la Salud (RAPPS)</b>                                                                                                                                                                                                                                                                                                                                                                                                                                                                                                                                                                                                                                                                                                                                                                         |
| <b>Breve descripción</b>                              | La Red integra a proyectos de los ámbitos sanitario, social y educativo conducidos por un equipo interdisciplinar que realizan una intervención en entornos locales de acuerdo con unos criterios de calidad en promoción de la salud. Los objetivos de la RAPPS son: a) Identificar proyectos de promoción y educación para la salud que se están llevando a cabo desde distintos sectores de Aragón; b) Fomentar la realización de nuevas experiencias de promoción de la salud desde un enfoque intersectorial e interdisciplinar, c) Promover la innovación en promoción de la salud y el desarrollo de modelos de buena práctica adaptados a diferentes contextos y C) Facilitar la gestión del conocimiento en promoción de la salud entre los equipos integrados en la Red y el intercambio y transferencia con otras redes y sistemas. |
| <b>Lugar de realización</b>                           | Aragón                                                                                                                                                                                                                                                                                                                                                                                                                                                                                                                                                                                                                                                                                                                                                                                                                                         |
| <b>Equipo de trabajo</b>                              | Equipo de la Red: SARES (Sistema de Asesoramiento y Recursos en Educación para la Salud) y Comisión Gestora de la RAPPS. Cada proyecto cuenta con su propio equipo de trabajo                                                                                                                                                                                                                                                                                                                                                                                                                                                                                                                                                                                                                                                                  |
| <b>Dimensión de salud en la que se trabaja</b>        | Los proyectos responden al contexto de cada entorno y abordan los aspectos prioritarios para el equipo de trabajo. Los temas más abordados son: Bienestar emocional; autocuidados habilidades personales; Prevención de tabaco, alcohol y otras drogas; alimentación; actividad física saludable; salud sexual; parentalidad positiva.                                                                                                                                                                                                                                                                                                                                                                                                                                                                                                         |
| <b>Población participante</b>                         | En 2015 hay 73 proyectos integrados en la RAPPS, en cuyos equipos de trabajo participan 701 personas, de las que el 89,6% son profesionales de diversos ámbitos y un 10,6% son agentes sociales de diferentes entidades sociales. La población destinataria de los proyectos es muy variada: comunidad educativa; población general, jóvenes, colectivos de mujeres; pacientes; cuidadores y grupos de ayuda mutua.                                                                                                                                                                                                                                                                                                                                                                                                                            |
| <b>Incorporación de ejes de equidad</b>               | Los proyectos abordan especialmente los aspectos relacionados con los determinantes sociales de la salud y promueven el empoderamiento de los grupos de personas en diferentes niveles sociales.                                                                                                                                                                                                                                                                                                                                                                                                                                                                                                                                                                                                                                               |
| <b>Técnicas de identificación de activos empleada</b> | Cada equipo identifica los activos y recursos de su zona, en el análisis inicial del proyecto: inventario de recursos comunitarios; diálogo y colaboración con las asociaciones y entidades del entorno; grupos focales; entrevistas a informantes clave.                                                                                                                                                                                                                                                                                                                                                                                                                                                                                                                                                                                      |
| <b>Difusión de la información</b>                     | Blog: <a href="http://redaragonesaproyectospromocionsalud.blogspot.com.es/">http://redaragonesaproyectospromocionsalud.blogspot.com.es/</a>                                                                                                                                                                                                                                                                                                                                                                                                                                                                                                                                                                                                                                                                                                    |



|                                                           |                                                                                                                                                                                                                                                                                                                                                                                                                                                                                                                                                                                                                                                                                                                                         |
|-----------------------------------------------------------|-----------------------------------------------------------------------------------------------------------------------------------------------------------------------------------------------------------------------------------------------------------------------------------------------------------------------------------------------------------------------------------------------------------------------------------------------------------------------------------------------------------------------------------------------------------------------------------------------------------------------------------------------------------------------------------------------------------------------------------------|
|                                                           | <p>Twitter: @rediniciativas</p> <p>Facebook: <a href="https://www.facebook.com/RAPPSalud/">https://www.facebook.com/RAPPSalud/</a></p>                                                                                                                                                                                                                                                                                                                                                                                                                                                                                                                                                                                                  |
| <b>Dinamización de activos y acciones generadas</b>       | <p>La Red facilita el intercambio de experiencias y la gestión del conocimiento en promoción de la salud en diferentes contextos. Un momento importante son las Jornadas de intercambio de experiencias de la RAPPs. La Red genera buenas prácticas que pueden ser transferidas al resto de centros y servicios de Aragón.</p>                                                                                                                                                                                                                                                                                                                                                                                                          |
| <b>Evaluación del proceso y de las acciones generadas</b> | <p>La sostenibilidad de los proyectos es un buen indicador de la madurez de las iniciativas, la duración media es de 12,7 años. El 74% de los proyectos activos tiene 11 y 19 años de duración y el 26% tiene menos de 10 años. Los cinco primeros años del proyecto es el momento crítico, el 80,9% de los proyectos se han dado de baja en ese periodo. Las buenas prácticas de la RAPPs han sido de utilidad para elaborar diferentes planes y actuaciones integrales (infancia, inmigración, drogodependencias, actividad física,...). La información de los proyectos locales ayuda a articular las propuestas que se realizan de arriba-abajo (planes y estrategias) con las iniciativas de abajo-arriba (salud comunitaria).</p> |
| <b>Información complementaria sobre el proyecto</b>       | <p>Web de salud Pública de Aragón:<br/> <a href="http://aragon.es/DepartamentosOrganismosPublicos/Departamentos/Sanidad/AreasTematicas/SanidadProfesionales/SaludPublica/PromocionSalud/RedAragonesaProyectosPromocionSalud_RAPPS?channelSelected=0">http://aragon.es/DepartamentosOrganismosPublicos/Departamentos/Sanidad/AreasTematicas/SanidadProfesionales/SaludPublica/PromocionSalud/RedAragonesaProyectosPromocionSalud_RAPPS?channelSelected=0</a><br/>                     Criterios de calidad de la RAPPs: <a href="http://bit.ly/1SnjLPf">http://bit.ly/1SnjLPf</a></p>                                                                                                                                                    |
|                                                           |                                                                                                                                                                                                                                                                                                                                                                                                                                                                                                                                                                                                                                                                                                                                         |

|                                                       |                                                                                                                                                                                                                                                                                                                                                                                                                                                                                                                                                                                                                                                                                                                                                                                                 |
|-------------------------------------------------------|-------------------------------------------------------------------------------------------------------------------------------------------------------------------------------------------------------------------------------------------------------------------------------------------------------------------------------------------------------------------------------------------------------------------------------------------------------------------------------------------------------------------------------------------------------------------------------------------------------------------------------------------------------------------------------------------------------------------------------------------------------------------------------------------------|
| <b>Nombre del proyecto</b>                            | <b>13. Red Aragonesa de Escuelas Promotoras de Salud (RAEPS)</b>                                                                                                                                                                                                                                                                                                                                                                                                                                                                                                                                                                                                                                                                                                                                |
| <b>Breve descripción</b>                              | <p>La RAEPS surge con la finalidad de acreditar como <i>escuelas promotoras de salud</i> a aquellos centros educativos que tienen un compromiso por la salud y el bienestar de la comunidad escolar, poseen una experiencia previa y cumplen con una serie de requisitos.</p> <p>La escuela promotora de salud prioriza en su proyecto educativo la promoción de la salud y facilita la adopción, por toda la comunidad educativa, de modos de vida sanos en un ambiente favorable a la salud incluyendo el modelo de organización del centro, la actuación frente a los determinantes de la salud, la programación educativa relacionada con la salud y las relaciones del centro con su entorno y la promoción de las competencias del alumnado basándose en las habilidades para la vida</p> |
| <b>Lugar de realización</b>                           | Aragón                                                                                                                                                                                                                                                                                                                                                                                                                                                                                                                                                                                                                                                                                                                                                                                          |
| <b>Equipo de trabajo</b>                              | Comisión mixta Salud-Educación y Equipo SARES.                                                                                                                                                                                                                                                                                                                                                                                                                                                                                                                                                                                                                                                                                                                                                  |
| <b>Dimensión de salud en la que se trabaja</b>        | Dentro de las dimensiones personal, relacional y ambiental de la promoción de salud en la infancia y adolescencia aborda los siguientes aspectos: alimentación; Actividad física saludable; Salud emocional y Convivencia; promoción de la salud frente a los consumos de sustancias (tabaco, alcohol y otras drogas) y los consumos de pantallas; entorno saludable, seguro y sostenible.                                                                                                                                                                                                                                                                                                                                                                                                      |
| <b>Población participante</b>                         | Durante el curso 2014-15 están integradas 134 escuelas promotoras de salud que imparten educación obligatoria (primaria y ESO), participando en los equipos de los centros 829 profesores/as que imparten educación a 45.204 alumnos/as.                                                                                                                                                                                                                                                                                                                                                                                                                                                                                                                                                        |
| <b>Incorporación de ejes de equidad</b>               | Podemos considerar que el modelo de escuela promotora de salud tiene un enfoque de universalismo proporcional, porque su ubicación tiene una correlación inversa con determinados indicadores que valoran nivel socioeconómico.                                                                                                                                                                                                                                                                                                                                                                                                                                                                                                                                                                 |
| <b>Técnicas de identificación de activos empleada</b> | La escuela promotora de salud fomenta la identificación y fomento de los activos de la comunidad educativa: conexión con el profesorado; participación de la comunidad educativa; educación entre iguales; cooperación con el entorno del centro; mejora del clima de trabajo.                                                                                                                                                                                                                                                                                                                                                                                                                                                                                                                  |
| <b>Difusión de la información</b>                     | <p>Blog: <a href="http://redescuelasaragon.blogspot.com.es/">http://redescuelasaragon.blogspot.com.es/</a></p> <p>Twitter: @epsaragon</p> <p>Facebook: <a href="https://www.facebook.com/RAEPSalud/">https://www.facebook.com/RAEPSalud/</a></p>                                                                                                                                                                                                                                                                                                                                                                                                                                                                                                                                                |
| <b>Dinamización de activos y acciones</b>             | Las jornadas anuales de la RAEPS son un momento para la valoración de las escuelas promotoras de salud acreditadas                                                                                                                                                                                                                                                                                                                                                                                                                                                                                                                                                                                                                                                                              |

|                                                           |                                                                                                                                                                                                                                                                                                                                                                                                                                                                              |
|-----------------------------------------------------------|------------------------------------------------------------------------------------------------------------------------------------------------------------------------------------------------------------------------------------------------------------------------------------------------------------------------------------------------------------------------------------------------------------------------------------------------------------------------------|
| <b>generadas</b>                                          | así como un desarrollo en determinados aspectos de la promoción de salud en infancia y adolescencia. En la actualidad el 25% de los centros educativos de primaria y ESO están integrados en la RAEPS. El blog es una forma de difundir las buenas prácticas a todos los centros educativos de Aragón.                                                                                                                                                                       |
| <b>Evaluación del proceso y de las acciones generadas</b> | Las escuelas se integran en la red mediante un cuestionario de acreditación y realizan un informe de progreso anualmente. Cada centro educativo realiza una valoración de lo realizado y realiza una propuesta de mejora para el curso siguiente. Un informe de la Red puede verse en <a href="http://bit.ly/1Q7aJ2D">http://bit.ly/1Q7aJ2D</a>                                                                                                                              |
| <b>Información complementaria sobre el proyecto</b>       | Web de salud Pública:<br><a href="http://aragon.es/DepartamentosOrganismosPublicos/Departamentos/Sanidad/AreasTematicas/SanidadProfesionales/SaludPublica/PromocionSalud/PromocionSaludEscuela/RedAragonesaEscuelasPromotorasSalud?channelSelected=0">http://aragon.es/DepartamentosOrganismosPublicos/Departamentos/Sanidad/AreasTematicas/SanidadProfesionales/SaludPublica/PromocionSalud/PromocionSaludEscuela/RedAragonesaEscuelasPromotorasSalud?channelSelected=0</a> |
|                                                           |                                                                                                                                                                                                                                                                                                                                                                                                                                                                              |

## Anexo 2. Check-list para la planificación del trabajo con activos para la salud en intervenciones de promoción de la salud y salud comunitaria

|                                                                                                                                                                                                                                                                                                                                                                                                                                                                               |
|-------------------------------------------------------------------------------------------------------------------------------------------------------------------------------------------------------------------------------------------------------------------------------------------------------------------------------------------------------------------------------------------------------------------------------------------------------------------------------|
| <b>Etapas 1. Preparación y contextualización</b>                                                                                                                                                                                                                                                                                                                                                                                                                              |
| <b>Objetivo</b><br>¿Cuál es el objetivo de trabajo?                                                                                                                                                                                                                                                                                                                                                                                                                           |
| <b>Finalidad</b><br>¿Para qué identificar los activos para la salud de un entorno, zona, ciudad?<br>Si ya existe un proceso de salud en marcha ¿en qué fase del proceso de trabajo se está?<br>¿El mapeo de activos se hace de forma simultánea o va a tener una relación con la identificación de necesidades?                                                                                                                                                               |
| <b>Ámbito de actuación</b><br>¿De qué territorio se identificarán activos?<br>¿Por qué en un territorio y no en otro?<br>¿Cuáles son los criterios de selección?                                                                                                                                                                                                                                                                                                              |
| <b>Tema</b><br>¿Sobre qué tema se van a identificar activos?<br>¿Por qué se elige este tema?                                                                                                                                                                                                                                                                                                                                                                                  |
| <b>Modelo teórico</b><br>¿Desde qué marco de intervención estamos trabajando?<br>¿Cómo encaja el mapeo de activos con ese marco de intervención?<br>¿Tenemos categorías definidas para ordenar los activos que vayamos identificando?                                                                                                                                                                                                                                         |
| <b>Acuerdos políticos y directivos</b><br>¿Se presentará a responsables políticos y directivos el objetivo del trabajo para facilitar que apoyen el proceso de identificar activos para la salud, difundirlos y ejecutar actuaciones basadas en su dinamización?                                                                                                                                                                                                              |
| <b>Equipos de trabajo</b><br>¿Cuántos equipos de trabajo se van a constituir? ¿Existirá un único equipo o habrá un equipo coordinador y un equipo para el trabajo de campo?<br>¿Quiénes los integrarán y por qué?<br>¿Cuáles son sus funciones?<br>¿Qué competencias necesitan poseer?<br>¿Existe un espacio de participación local en salud?<br>¿El proceso de identificación de activos es quizás una buena oportunidad para revitalizar un espacio de participación local? |
| <b>Conocimiento del modelo de activos por el equipo de trabajo de campo</b><br>¿Cómo se va a facilitar que el equipo de trabajo de campo conozca e incorpore el modelo de activos?<br>¿Qué acciones formativas (seminarios, talleres, ...) se van a realizar?                                                                                                                                                                                                                 |
| <b>Población</b><br>¿Qué personas van a participar en la identificación de activos? ¿Población, profesionales, responsables de servicios, responsables políticos?<br>¿Quiénes pueden facilitar la participación de la población?<br>¿Qué estrategia se utilizará para incorporar todas las voces de la comunidad en el proceso (teniendo en cuenta los ejes de equidad: clase social, género, edad, país de nacimiento/etnia, diversidad funcional)?                          |

|                                                                                                                                                                                                                                                                                                                                                                                                                                                                                  |
|----------------------------------------------------------------------------------------------------------------------------------------------------------------------------------------------------------------------------------------------------------------------------------------------------------------------------------------------------------------------------------------------------------------------------------------------------------------------------------|
| <b>Etapla 2. Recogida de la información: metodologías a utilizar para identificar activos</b>                                                                                                                                                                                                                                                                                                                                                                                    |
| <b>Técnicas para identificar activos</b><br>¿Qué técnicas van a ser utilizadas? Selección y adaptación según contexto y población participante<br>¿Qué preguntas se van a formular para que la población identifique activos? ¿Tipología? ¿Por qué se consideran activos?<br>¿Cómo se va a recoger la información que se genere?<br>¿Cómo se va a evaluar el proceso de recogida de información? ¿Por la población? ¿Por el equipo de trabajo de campo?                          |
| <b>Temporalización</b><br>¿Cuándo se va a realizar?<br>¿Se contempla ampliar el plazo si se prevé falta de asistencia de la población?                                                                                                                                                                                                                                                                                                                                           |
| <b>Lugar de realización</b><br>De forma detallada ¿Dónde se va a realizar la identificación de activos?                                                                                                                                                                                                                                                                                                                                                                          |
| <b>Recursos materiales</b><br>¿Qué recursos y de qué tipo serán necesarios? En función de las técnicas de recogida y análisis de la información                                                                                                                                                                                                                                                                                                                                  |
| <b>Etapla 3. Análisis, interpretación y presentación de la información</b>                                                                                                                                                                                                                                                                                                                                                                                                       |
| ¿Qué tipo de análisis se va a realizar?<br>¿Qué marco teórico o modelo se va a utilizar para el análisis de la información?<br>¿Qué técnicas se van a utilizar para analizar la información?<br>¿Cómo se van a representar los activos identificados?<br>¿Se va a utilizar un mapa y de qué tipo?<br>¿Qué recursos se necesitarán para su representación?                                                                                                                        |
| <b>Etapla 4. Difusión (visibilización) de los activos</b>                                                                                                                                                                                                                                                                                                                                                                                                                        |
| ¿A quiénes se va a presentar el mapa?<br>¿Quiénes tendrán acceso?<br>¿Cómo se van a compartir los resultados con las distintas poblaciones implicadas?<br>¿A través de qué medios se va a difundir? ¿De qué medios disponemos?<br>¿Cómo se va a difundir? ¿En que plazos orientativos?<br>¿Cómo se van a recoger e incorporar las nuevas aportaciones que se generen en la etapa de la difusión?                                                                                 |
| <b>Etapla 5. Conexiones y dinamización de los activos</b>                                                                                                                                                                                                                                                                                                                                                                                                                        |
| <b>Equipos de trabajo para la dinamización</b><br>¿Quiénes dirigen este proceso?<br>¿Quiénes participan en este proceso?                                                                                                                                                                                                                                                                                                                                                         |
| <b>Diagnóstico de necesidades</b><br>¿Cuáles son las necesidades que existen?<br>¿Cuáles son las fuentes de información que las han identificado?<br>Si no se dispone de información sobre necesidades o no está actualizada ¿se realizará un <i>rappid apraisal</i> (Foz, 2002) con participación de agentes implicados?<br>¿Cuáles son las necesidades prioritarias de actuación?<br>¿Qué criterios se van a considerar para priorizar?<br>¿Quiénes priorizan las necesidades? |
| <b>Conectando activos</b><br>¿Se parte de conectar activos a partir de un análisis de necesidades?<br>¿Cómo se conectan los activos identificados?<br>¿Quiénes los conectan?                                                                                                                                                                                                                                                                                                     |

¿Qué conexiones se realizan?

**Propuestas de acción**

¿Quiénes realizan las propuestas de acción?

¿Qué propuestas de acción se realizan?

¿Se realizan teniendo en cuenta las necesidades?

¿Cómo se van a trasladar a responsables políticos y de servicios para su puesta en marcha?

¿Cuáles de estas acciones se pueden poner en marcha de manera más sencilla en un corto plazo de tiempo?

¿Qué acciones podrían realizarse a medio y largo plazo? ¿Cómo podrían encadenarse con las acciones a corto plazo? ¿Quiénes pueden materializarlas?

**7. Evaluación**

¿Cómo se realizará la evaluación de todo el proceso?

¿Cómo se van a evaluar las acciones concretas en salud que se van a llevar a cabo?

Anexo 3. Técnicas para identificar distintos activos para la salud en un territorio y valoración de las mismas <sup>a</sup>

|                            | Técnicas                 |                                         |                                                         |                                                   |                            |                               |                                        |                        |                                                              |                                                      |                                                                           |
|----------------------------|--------------------------|-----------------------------------------|---------------------------------------------------------|---------------------------------------------------|----------------------------|-------------------------------|----------------------------------------|------------------------|--------------------------------------------------------------|------------------------------------------------------|---------------------------------------------------------------------------|
| Activos                    | Entrevistas <sup>b</sup> | Grupo focal o de discusión <sup>c</sup> | Análisis documental (webs, redes sociales) <sup>d</sup> | Conversación informales/ Observación <sup>f</sup> | Mapping party <sup>g</sup> | Gymkhana - mapeo <sup>h</sup> | <i>Photovoice/Fotovoz</i> <sup>i</sup> | Mapa mudo <sup>j</sup> | Investigación narrativa ( <i>Storytelling</i> ) <sup>k</sup> | Tertulias de café ( <i>World Cafe</i> ) <sup>l</sup> | Asambleas, foros comunitarios u <i>Open Space Technology</i> <sup>m</sup> |
| Intangibles                | ++                       | +                                       | +                                                       | +++                                               | ++                         | ++                            | +++                                    | +++                    | +++                                                          | +++                                                  | +                                                                         |
| De las personas            | +++                      | +++                                     | +                                                       | +++                                               | ++                         | ++                            | ++                                     | +++                    | +++                                                          | +++                                                  | ++                                                                        |
| De las instituciones       | ++                       | ++                                      | +++                                                     | +                                                 | +                          | +                             | +                                      | +                      | +                                                            | +                                                    | ++                                                                        |
| De asociaciones formales   | ++                       | ++                                      | +++                                                     | +                                                 | +                          | +                             | +                                      | +                      | +                                                            | +                                                    | ++                                                                        |
| De asociaciones informales | ++                       | ++                                      | +                                                       | ++                                                | ++                         | ++                            | ++                                     | ++                     | ++                                                           | ++                                                   | +++                                                                       |
| Físicos                    | ++                       | ++                                      | ++                                                      | ++                                                | ++                         | ++                            | +++                                    | +++                    | ++                                                           | ++                                                   | +++                                                                       |
| Económicos                 | ++                       | ++                                      | ++                                                      | ++/+                                              | +                          | +                             | +                                      | ++                     | +                                                            | ++                                                   | ++                                                                        |
| Culturales                 | ++                       | ++                                      | ++                                                      | ++                                                | ++                         | ++                            | ++                                     | +++                    | ++                                                           | ++                                                   | ++                                                                        |

<sup>a</sup> Modificada de Botello B, Palacio S, García M, et al. <sup>1</sup>.  
Valoración orientativa de la técnica: +++ Muy adecuada, ++ Adecuada, + Puede ser adecuada.

Descripción de cada una de las técnicas citadas:

- <sup>b</sup> Entrevistas en profundidad<sup>2-4</sup>: conversación entre la persona clave y la persona que recoge la información. Técnica orientada a la comprensión de las perspectivas que tienen las personas respecto a sus comportamientos, sentimientos o experiencias.
- <sup>c</sup> Grupos focales y de discusión<sup>5-8</sup>: conversación de un grupo pequeño diseñado para obtener información de un tema de interés común, con un guión de preguntas y la ayuda de un moderador. La conversación puede estar muy ajustada a un guión o ser más abierta.
- <sup>d</sup> Análisis documental: búsqueda de información en documentos de todo tipo (hemerotecas, catálogos, webs, blogs, redes sociales...).
- <sup>e</sup> Conversaciones informales<sup>9,10</sup>: la persona que recoge la información recoge datos a través de diálogos espontáneos con la comunidad. Puede haber una ruta estructurada (en tiempo y espacio) para recoger dicha información o puede hacerse de forma más abierta.
- <sup>f</sup> Observación: de forma enmascarada o no enmascarada se observan comportamientos de las personas, utilización y disposición de recursos en la comunidad.
- <sup>g</sup> *Mapping party*: encuentro de personas que se reúnen para cartografiar de forma colectiva determinados lugares mientras se pasea, se observa y se conversa. El paseo puede estar muy estructurado desde el momento inicial o puede ser más abierto.
- <sup>h</sup> Gymkhana-mapeo<sup>11</sup>: establecer un recorrido de forma lúdica facilitando la reflexión e identificación de activos así como la identificación y captación audiovisual de los mismos.
- <sup>i</sup> Fotovoz (*Photovoice*)<sup>12</sup>: técnica para describir e intercambiar impresiones a través de fotografías de la comunidad.
- <sup>j</sup> Mapas mudos: en una cartografía donde sólo se presentan los contornos de un territorio se van representando los diferentes activos.
- <sup>k</sup> Investigación narrativa (*storytelling*)<sup>9,13</sup>: invitación a la gente a contar y compartir historias.
- <sup>l</sup> Tertulias de café<sup>9,14,15</sup>: generar conversación sobre un tema de interés. En el café, cinco o seis personas alrededor de una mesa charlan entre sí y una persona hace de anfitrión. Al cabo de 20 minutos se cambian de mesa y el anfitrión se queda para resumir a los nuevos la discusión previa. Al final, se recogen y extraen los temas por parte de todo el grupo.
- <sup>m</sup> Asambleas, foros comunitarios u *Open Space Technology*: son diferentes técnicas para dinamizar reuniones con muchas personas. La duración de las sesiones pueden ser variables y también los objetivos y el diseño de las mismas.
